# Supplementary material for: Synthesis of Water-Dispersible Poly(dimethylsiloxane) and Its Potential Application in the Paper Coating Industry as an Alternative for PFAS-Coated Paper and Single-Use Plastics
Source: MDPI journal article supplement (doi:10.3390/polym16071006), 2024-04-07
Supplement: s1 [file s1]

# Synthesis of Water-Dispersible Poly(dimethylsiloxane) and Its Potential Application in the Paper Coating Industry as an Alternative for PFAS-Coated Paper and Single-Use Plastics

Syeda Shamila Hamdani <sup>1,†</sup>, Hazem M. Elkholy <sup>1,†,‡</sup>, Alexandra Alford <sup>1</sup>, Kang Jackson <sup>1</sup>, Muhammad Naveed <sup>1</sup>, Ian Wyman <sup>1</sup>, Yun Wang <sup>2</sup>, Kecheng Li <sup>2</sup>, Syed W. Haider <sup>3</sup> and Muhammad Rabnawaz <sup>1,\*</sup>

<sup>1</sup> School of Packaging, Michigan State University, 448 Wilson Road, East Lansing, MI 48824, USA; hamdanis@msu.edu (S.S.H.); elkholyh@msu.edu (H.M.E.)

<sup>2</sup> Department of Chemical and Paper Engineering, Western Michigan University, 1903 W, Michigan Avenue, Kalamazoo, MI 49008, USA

<sup>3</sup> Department of Civil & Environmental Engineering, Michigan State University, East Lansing, MI 48824, USA

\* Correspondence: rabnawaz@msu.edu

† These authors contributed equally to this work.

‡ H.M.E. is on leave from the Department of Chemistry, Faculty of Science, Tanta University, Tanta 31527, Egypt.

**Table S1.** Selected formulations and corresponding codes used in this study.

| Abbreviated name | PDMS (g) | Starch (g) | NH <sub>4</sub> HCO <sub>3</sub> (g) |
|------------------|----------|------------|--------------------------------------|
| B-KP             | -        | -          | -                                    |
| S-5              | -        | -          | -                                    |
| P1S0             | 1        | 0          | 0.20                                 |
| P1S1             | 0.5      | 0.5        | 0.10                                 |
| P2S1             | 0.66     | 0.33       | 0.14                                 |
| P3S1             | 0.75     | 0.25       | 0.17                                 |
| P4S1             | 0.8      | 0.2        | 0.186                                |

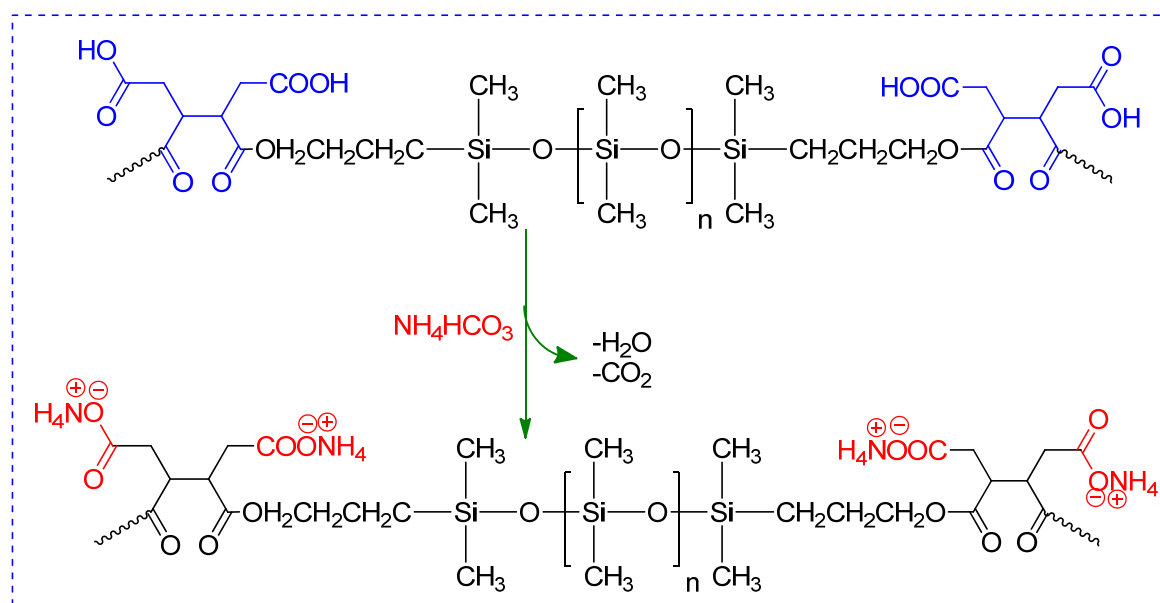

**Scheme S1.** Ionization of PDMS-COOH using ammonium bicarbonate in water.

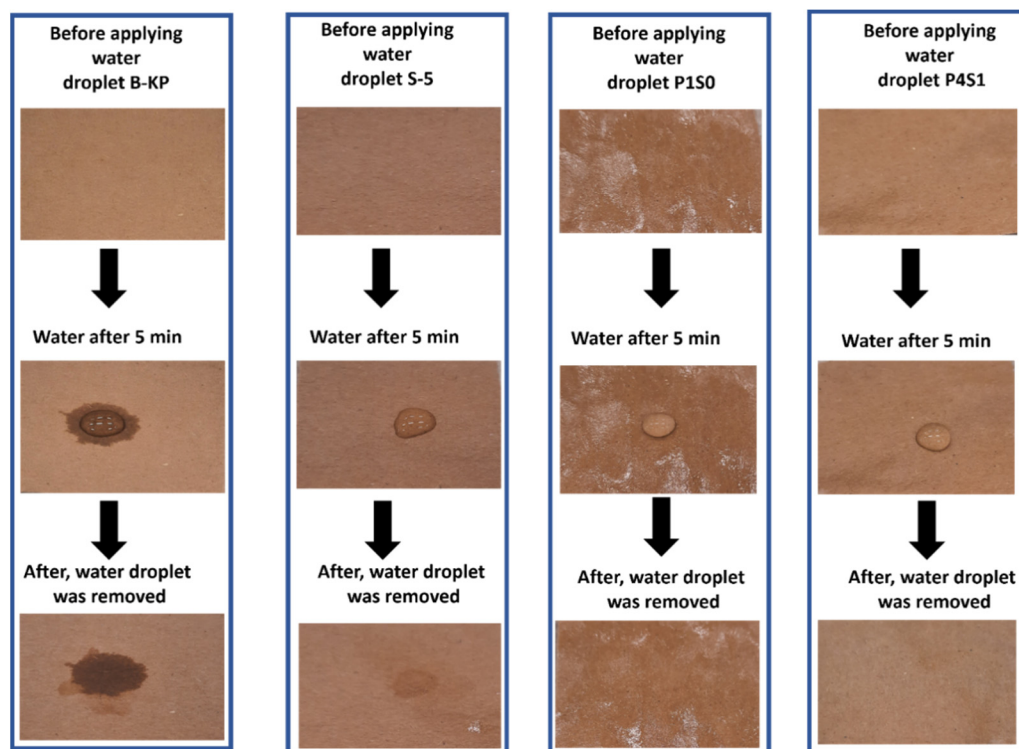

**Figure S1.** Photographs of blank kraft paper (B-K) and coated paper samples (S-5, P1S0, and P4S1) before the application of water droplets, 5 min after the application of water droplets, and after the removal of the water droplets.

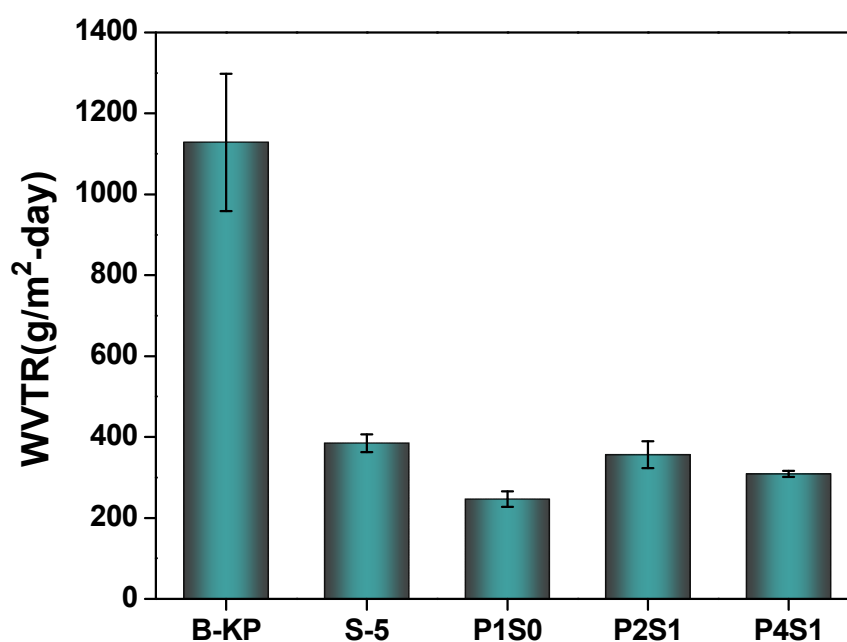

**Figure S2.** WVTR (g/m<sup>2</sup>-day) of blank kraft paper and coated paper samples at different %RH (50% & 90%) and temperatures (23 & 38 °C).

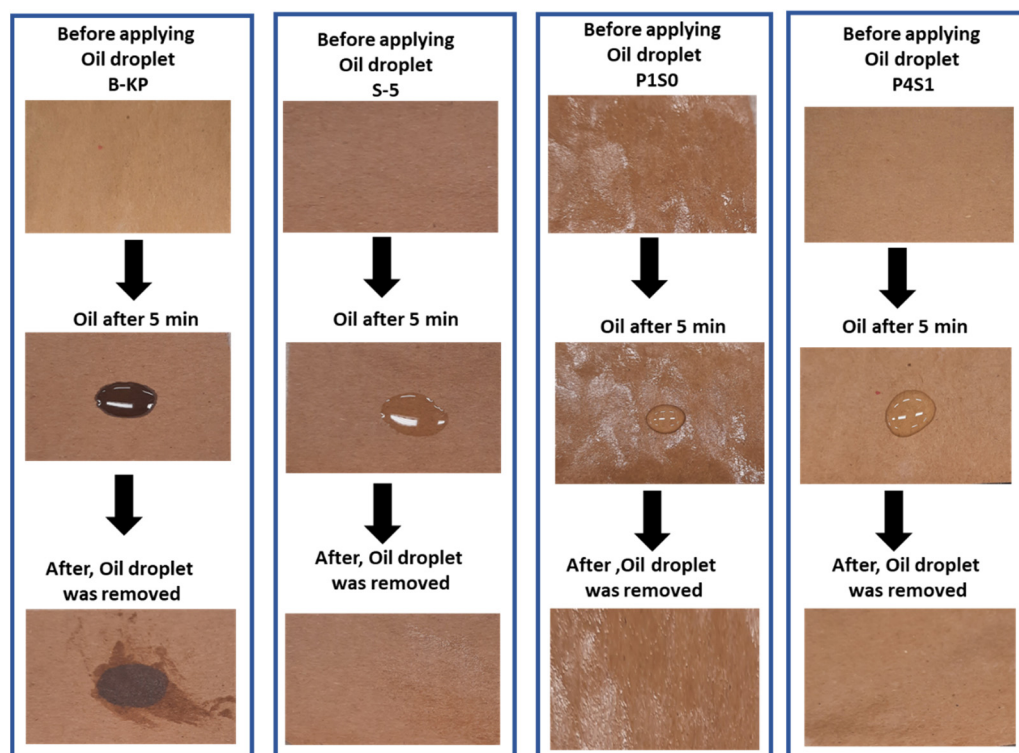

**Figure S3.** Photographs of uncoated (B-KP) and coated paper samples (S-5, P1S0, and P4S1) before the application of castor oil droplets, 5 min after the application of these droplets, and after the removal of these droplets.

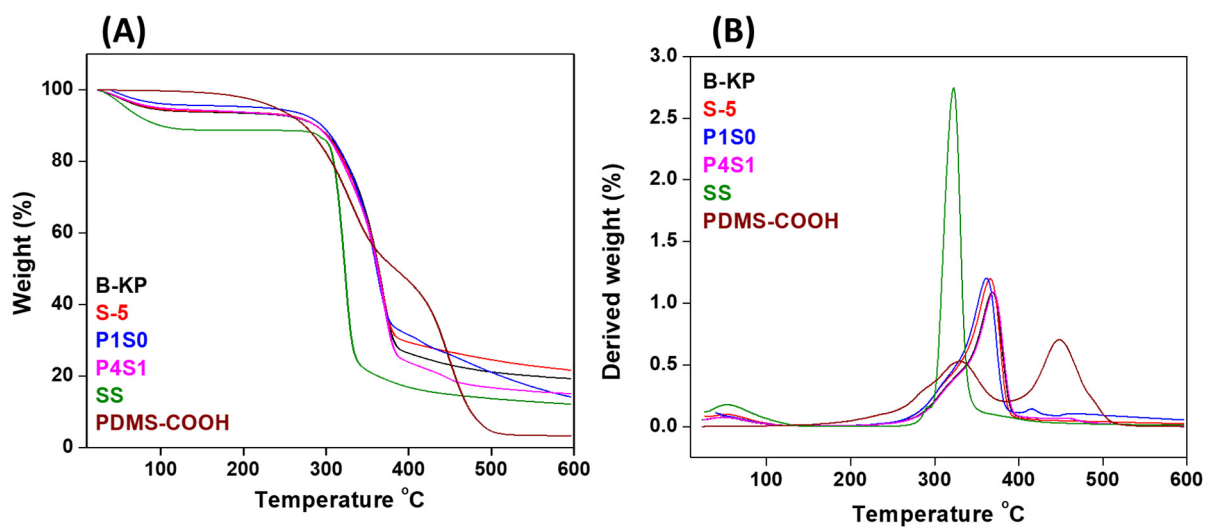

**Figure S4.** (A) TGA plots of blank kraft paper, coated paper samples, and samples of solid coating material. (B) DTG plots of blank kraft paper, coated-paper samples, and solid material used in coating including PDMS-COOH and solid starch (SS).

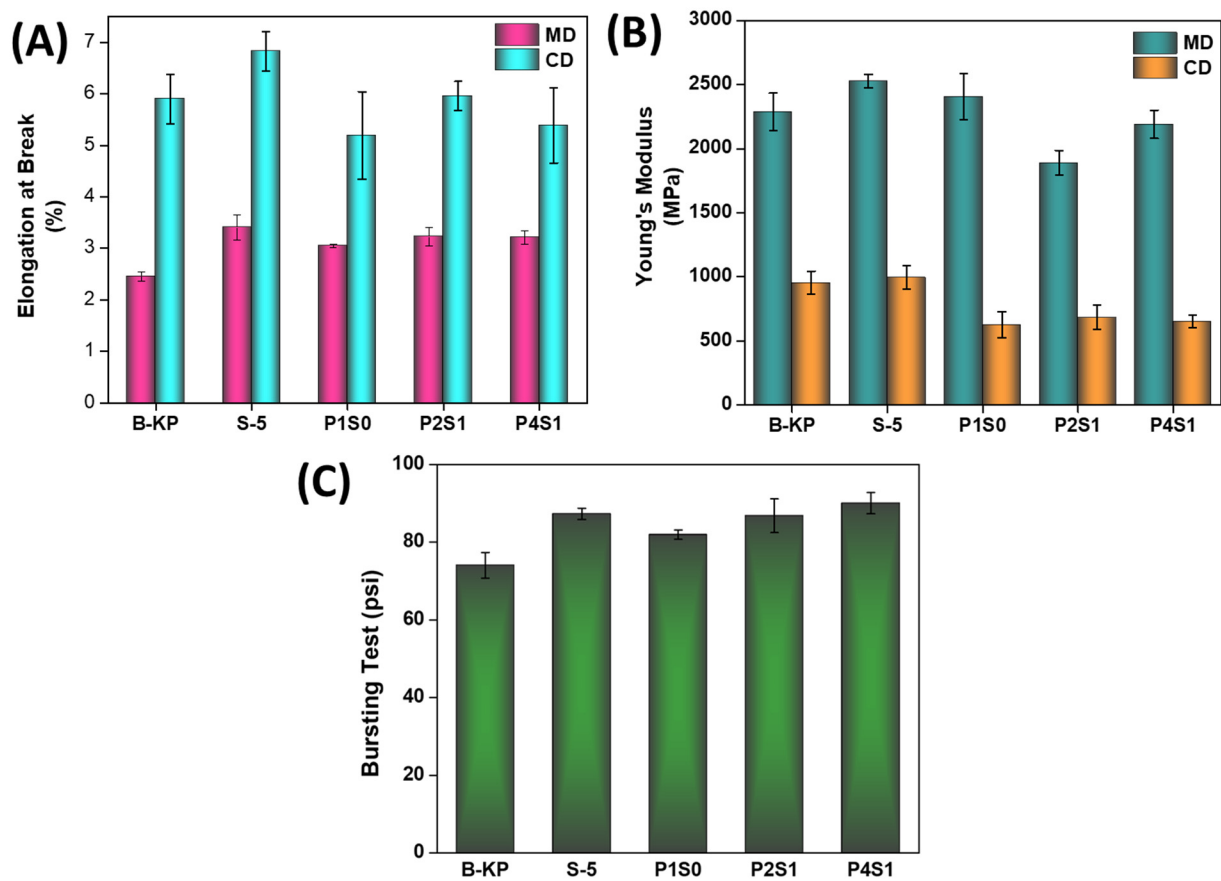

**Figure S5.** % Elongation at break (A), Young's modulus (B), and bursting test (C) of blank kraft paper and coated paper samples.

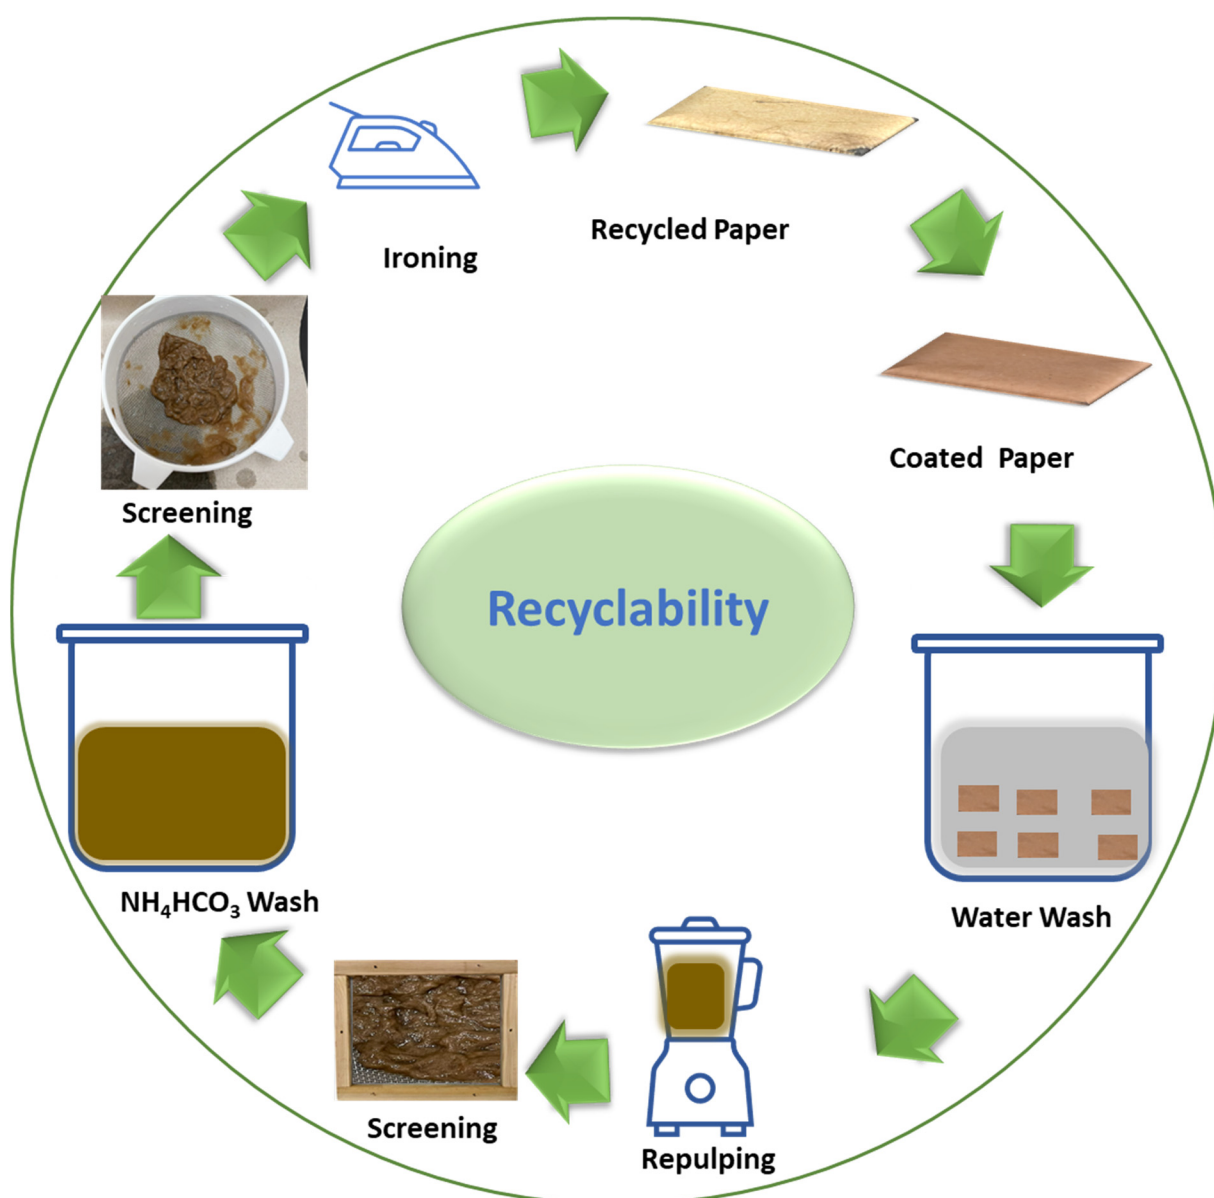

**Scheme S2.** Paper recycling via the repulping approach using blank kraft paper and P1S4-coated paper.

### Statistical Analysis

**Table S2.** Tukey multiple mean comparisons of treatment effects on **water contact angle** after 5 min.

| Difference of Levels | Difference of Means | SE of Difference | 95% CI           | T-Value | Adjusted P-Value |
|----------------------|---------------------|------------------|------------------|---------|------------------|
| P1S0 - B-KP          | 87.65               | 1.13             | (83.18, 92.12)   | 77.72   | 0.000            |
| P1S1 - B-KP          | 80.26               | 1.13             | (75.79, 84.73)   | 71.17   | 0.000            |
| P2S1 - B-KP          | 76.05               | 1.13             | (71.58, 80.52)   | 67.44   | 0.000            |
| P3S1 - B-KP          | 87.55               | 1.13             | (83.08, 92.02)   | 77.63   | 0.000            |
| P4S1 - B-KP          | 81.80               | 1.13             | (77.33, 86.27)   | 72.54   | 0.000            |
| S-5 - B-KP           | 45.80               | 1.13             | (41.33, 50.27)   | 40.61   | 0.000            |
| P1S1 - P1S0          | -7.39               | 1.13             | (-11.86, -2.92)  | -6.55   | 0.003            |
| P2S1 - P1S0          | -11.60              | 1.13             | (-16.07, -7.13)  | -10.29  | 0.000            |
| P3S1 - P1S0          | -0.10               | 1.13             | (-4.57, 4.37)    | -0.09   | 1.000            |
| P4S1 - P1S0          | -5.85               | 1.13             | (-10.32, -1.38)  | -5.19   | 0.013            |
| S-5 - P1S0           | -41.85              | 1.13             | (-46.32, -37.38) | -37.11  | 0.000            |
| P2S1 - P1S1          | -4.21               | 1.13             | (-8.68, 0.26)    | -3.73   | 0.066            |
| P3S1 - P1S1          | 7.29                | 1.13             | (2.82, 11.76)    | 6.46    | 0.004            |
| P4S1 - P1S1          | 1.54                | 1.13             | (-2.93, 6.01)    | 1.37    | 0.804            |

|             |        |      |                  |        |       |
|-------------|--------|------|------------------|--------|-------|
| S-5 - P1S1  | -34.46 | 1.13 | (-38.93, -29.99) | -30.56 | 0.000 |
| P3S1 - P2S1 | 11.50  | 1.13 | (7.03, 15.97)    | 10.20  | 0.000 |
| P4S1 - P2S1 | 5.75   | 1.13 | (1.28, 10.22)    | 5.10   | 0.014 |
| S-5 - P2S1  | -30.25 | 1.13 | (-34.72, -25.78) | -26.82 | 0.000 |
| P4S1 - P3S1 | -5.75  | 1.13 | (-10.22, -1.28)  | -5.10  | 0.014 |
| S-5 - P3S1  | -41.75 | 1.13 | (-46.22, -37.28) | -37.02 | 0.000 |
| S-5 - P4S1  | -36.00 | 1.13 | (-40.47, -31.53) | -31.92 | 0.000 |

Individual confidence level = 99.46%.

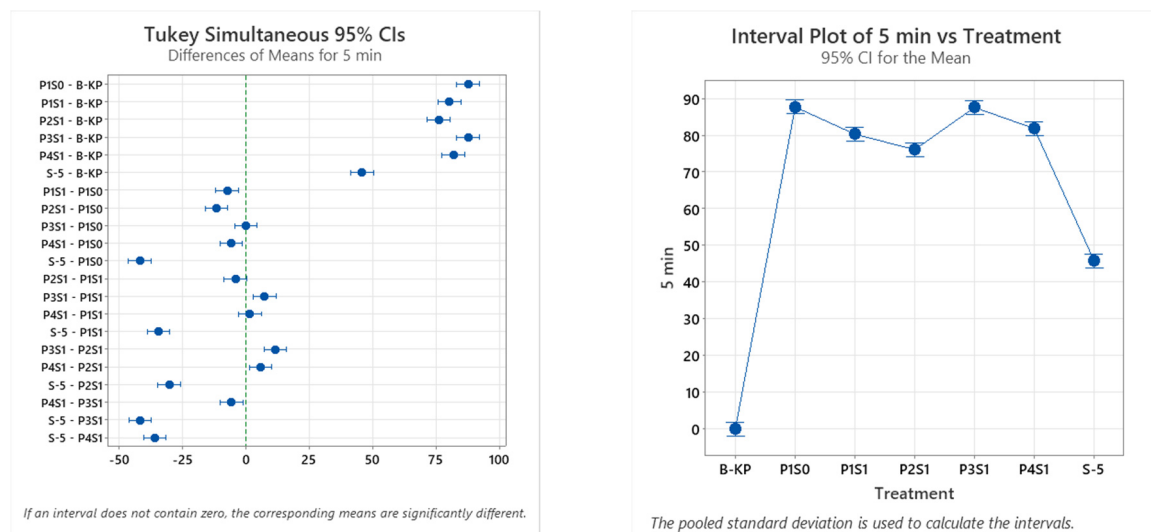

Figure S6. Effect of treatments on water contact angle after 5 min.

Table S3. Tukey multiple mean comparisons of treatment effects on oil contact angle after 5 min.

| Difference of Levels | Difference of Means | SE of Difference | 95% CI           | T-Value | Adjusted P-Value |
|----------------------|---------------------|------------------|------------------|---------|------------------|
| P1S0 - B-KP          | 43.55               | 1.82             | (36.34, 50.76)   | 23.98   | 0.000            |
| P1S1 - B-KP          | 30.45               | 1.82             | (23.24, 37.66)   | 16.76   | 0.000            |
| P2S1 - B-KP          | 36.60               | 1.82             | (29.39, 43.81)   | 20.15   | 0.000            |
| P3S1 - B-KP          | 37.50               | 1.82             | (30.29, 44.71)   | 20.65   | 0.000            |
| P4S1 - B-KP          | 42.20               | 1.82             | (34.99, 49.41)   | 23.23   | 0.000            |
| S-5 - B-KP           | -8.35               | 1.82             | (-15.56, -1.14)  | -4.60   | 0.024            |
| P1S1 - P1S0          | -13.10              | 1.82             | (-20.31, -5.89)  | -7.21   | 0.002            |
| P2S1 - P1S0          | -6.95               | 1.82             | (-14.16, 0.26)   | -3.83   | 0.059            |
| P3S1 - P1S0          | -6.05               | 1.82             | (-13.26, 1.16)   | -3.33   | 0.106            |
| P4S1 - P1S0          | -1.35               | 1.82             | (-8.56, 5.86)    | -0.74   | 0.984            |
| S-5 - P1S0           | -51.90              | 1.82             | (-59.11, -44.69) | -28.57  | 0.000            |
| P2S1 - P1S1          | 6.15                | 1.82             | (-1.06, 13.36)   | 3.39    | 0.099            |
| P3S1 - P1S1          | 7.05                | 1.82             | (-0.16, 14.26)   | 3.88    | 0.055            |
| P4S1 - P1S1          | 11.75               | 1.82             | (4.54, 18.96)    | 6.47    | 0.004            |
| S-5 - P1S1           | -38.80              | 1.82             | (-46.01, -31.59) | -21.36  | 0.000            |
| P3S1 - P2S1          | 0.90                | 1.82             | (-6.31, 8.11)    | 0.50    | 0.998            |
| P4S1 - P2S1          | 5.60                | 1.82             | (-1.61, 12.81)   | 3.08    | 0.143            |
| S-5 - P2S1           | -44.95              | 1.82             | (-52.16, -37.74) | -24.75  | 0.000            |
| P4S1 - P3S1          | 4.70                | 1.82             | (-2.51, 11.91)   | 2.59    | 0.257            |
| S-5 - P3S1           | -45.85              | 1.82             | (-53.06, -38.64) | -25.24  | 0.000            |
| S-5 - P4S1           | -50.55              | 1.82             | (-57.76, -43.34) | -27.83  | 0.000            |

Individual confidence level = 99.46%.

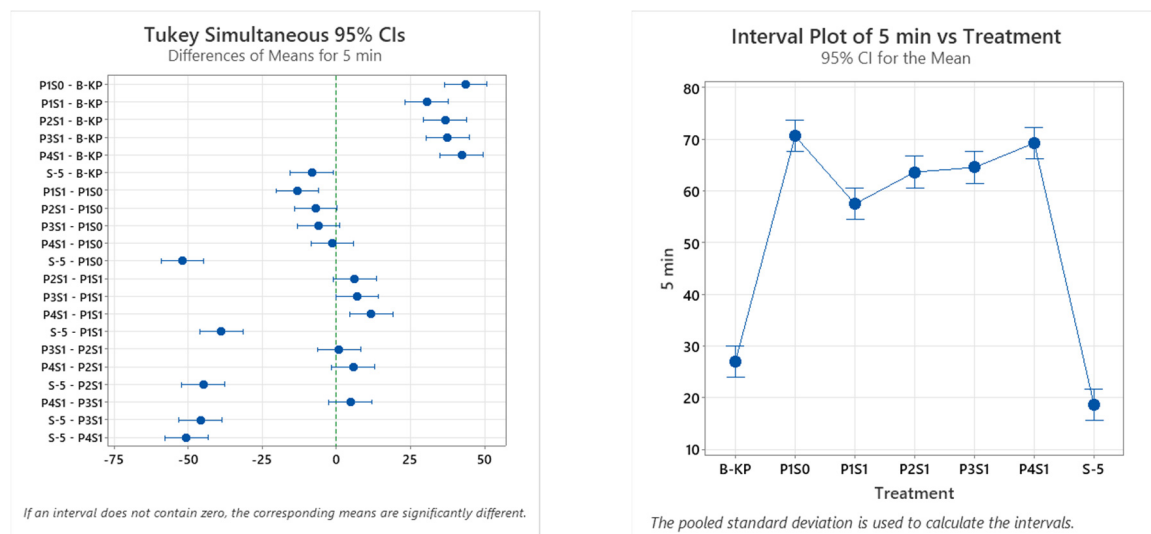

**Figure S7.** Effect of treatments on oil contact angle after 5 min.

**Table S4.** Tukey multiple mean comparisons of treatment effects on tensile strength (MD).

| Difference of Levels | Difference of Means | SE of Difference | 95% CI          | T-Value | Adjusted P-Value |
|----------------------|---------------------|------------------|-----------------|---------|------------------|
| P1S0 - B-KP          | 4.87                | 1.34             | (0.46, 9.28)    | 3.63    | 0.030            |
| P2S1 - B-KP          | -0.73               | 1.34             | (-5.14, 3.68)   | -0.55   | 0.980            |
| P4S1 - B-KP          | 3.17                | 1.34             | (-1.24, 7.58)   | 2.36    | 0.203            |
| S-5 - B-KP           | 7.20                | 1.34             | (2.79, 11.61)   | 5.37    | 0.002            |
| P2S1 - P1S0          | -5.60               | 1.34             | (-10.01, -1.19) | -4.18   | 0.013            |
| P4S1 - P1S0          | -1.70               | 1.34             | (-6.11, 2.71)   | -1.27   | 0.715            |
| S-5 - P1S0           | 2.33                | 1.34             | (-2.08, 6.74)   | 1.74    | 0.454            |
| P4S1 - P2S1          | 3.90                | 1.34             | (-0.51, 8.31)   | 2.91    | 0.090            |
| S-5 - P2S1           | 7.93                | 1.34             | (3.52, 12.34)   | 5.92    | 0.001            |
| S-5 - P4S1           | 4.03                | 1.34             | (-0.38, 8.44)   | 3.01    | 0.078            |

Individual confidence level = 99.18%.

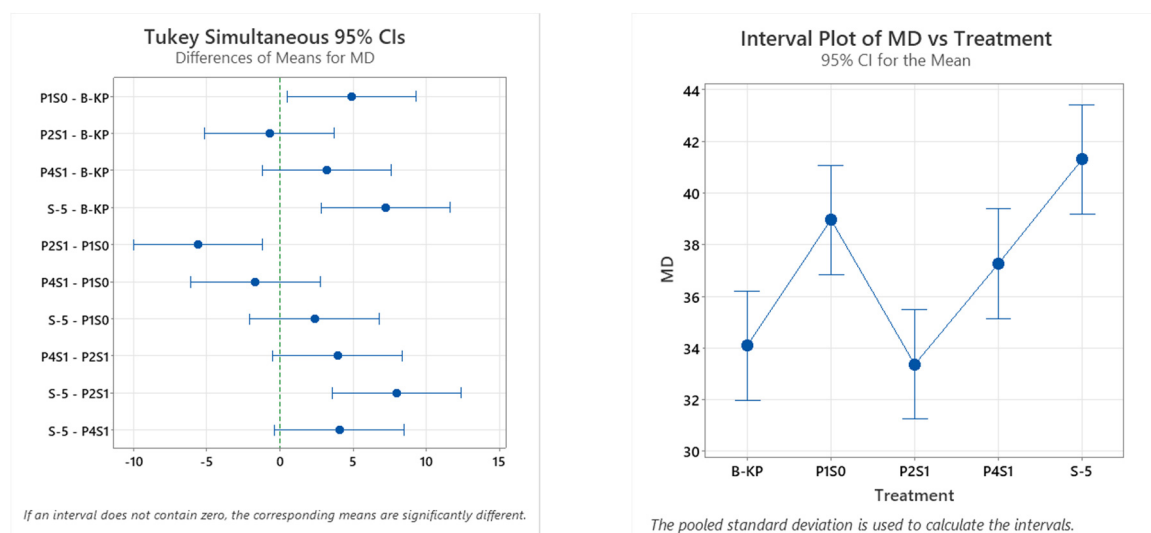

**Figure S8.** Effect of treatments on tensile strength (MD).

**Table S5.** Tukey multiple mean comparisons of treatment effects on tensile strength (CD).

| Difference of Levels | Difference of Means | SE of Difference | 95% CI          | T-Value | Adjusted P-Value |
|----------------------|---------------------|------------------|-----------------|---------|------------------|
| P1S0 - B-KP          | -1.800              | 0.552            | (-3.616, 0.016) | -3.26   | 0.052            |
| P2S1 - B-KP          | -1.267              | 0.552            | (-3.082, 0.549) | -2.29   | 0.223            |



|             |        |       |                 |       |       |
|-------------|--------|-------|-----------------|-------|-------|
| P4S1 - B-KP | -1.400 | 0.552 | (-3.216, 0.416) | -2.54 | 0.158 |
| S-5 - B-KP  | 2.533  | 0.552 | (0.718, 4.349)  | 4.59  | 0.007 |
| P2S1 - P1S0 | 0.533  | 0.552 | (-1.282, 2.349) | 0.97  | 0.864 |
| P4S1 - P1S0 | 0.400  | 0.552 | (-1.416, 2.216) | 0.72  | 0.946 |
| S-5 - P1S0  | 4.333  | 0.552 | (2.518, 6.149)  | 7.85  | 0.000 |
| P4S1 - P2S1 | -0.133 | 0.552 | (-1.949, 1.682) | -0.24 | 0.999 |
| S-5 - P2S1  | 3.800  | 0.552 | (1.984, 5.616)  | 6.88  | 0.000 |
| S-5 - P4S1  | 3.933  | 0.552 | (2.118, 5.749)  | 7.12  | 0.000 |

Individual confidence level = 99.18%.

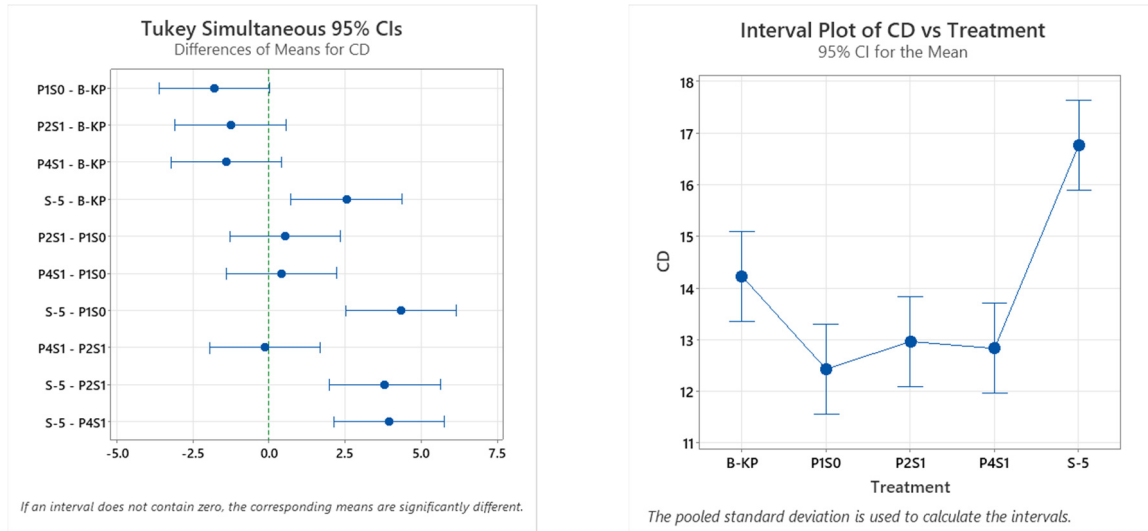

**Figure S9.** Effect of treatments on tensile strength (CD).

**Table S6.** Tukey multiple mean comparisons of treatment effects on % elongation (MD).

| Difference of Levels | Difference of Means | SE of Difference | 95% CI          | T-Value | Adjusted P-Value |
|----------------------|---------------------|------------------|-----------------|---------|------------------|
| P1S0 - B-KP          | 0.593               | 0.125            | (0.181, 1.006)  | 4.73    | 0.006            |
| P2S1 - B-KP          | 0.773               | 0.125            | (0.361, 1.186)  | 6.17    | 0.001            |
| P4S1 - B-KP          | 0.757               | 0.125            | (0.344, 1.169)  | 6.04    | 0.001            |
| S-5 - B-KP           | 0.950               | 0.125            | (0.538, 1.362)  | 7.58    | 0.000            |
| P2S1 - P1S0          | 0.180               | 0.125            | (-0.232, 0.592) | 1.44    | 0.621            |
| P4S1 - P1S0          | 0.163               | 0.125            | (-0.249, 0.576) | 1.30    | 0.696            |
| S-5 - P1S0           | 0.357               | 0.125            | (-0.056, 0.769) | 2.84    | 0.099            |
| P4S1 - P2S1          | -0.017              | 0.125            | (-0.429, 0.396) | -0.13   | 1.000            |
| S-5 - P2S1           | 0.177               | 0.125            | (-0.236, 0.589) | 1.41    | 0.636            |
| S-5 - P4S1           | 0.193               | 0.125            | (-0.219, 0.606) | 1.54    | 0.561            |

Individual confidence level = 99.18%.



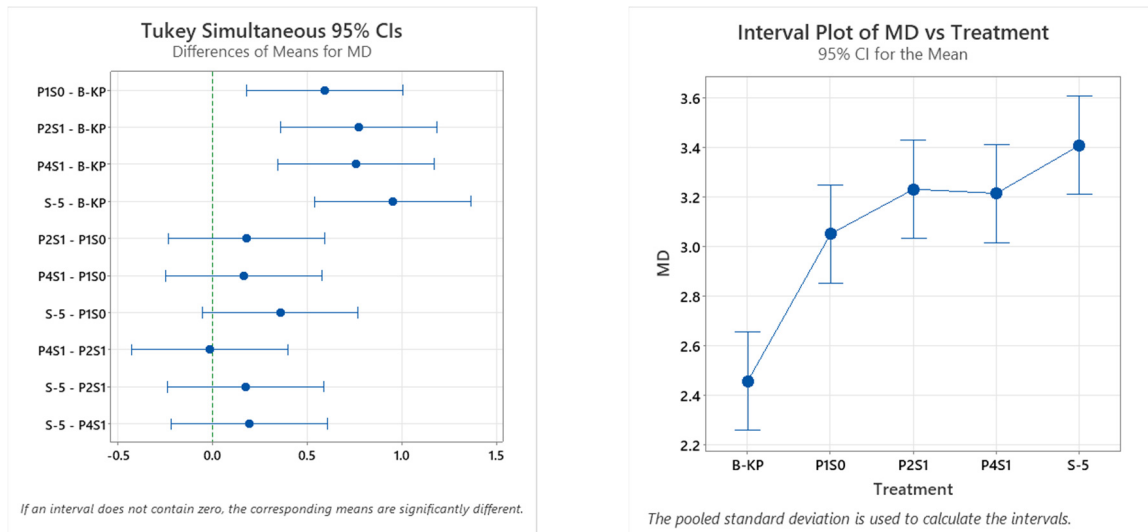

**Figure S10.** Effect of treatments on % elongation (MD).

**Table S7.** Tukey multiple mean comparisons of treatment effects on % elongation (CD).

| Difference of Levels | Difference of Means | SE of Difference | 95% CI          | T-Value | Adjusted P-Value |
|----------------------|---------------------|------------------|-----------------|---------|------------------|
| P1S0 - B-KP          | -0.710              | 0.478            | (-2.280, 0.860) | -1.49   | 0.592            |
| P2S1 - B-KP          | 0.057               | 0.478            | (-1.514, 1.627) | 0.12    | 1.000            |
| P4S1 - B-KP          | -0.513              | 0.478            | (-2.084, 1.057) | -1.07   | 0.815            |
| S-5 - B-KP           | 0.923               | 0.478            | (-0.647, 2.494) | 1.93    | 0.361            |
| P2S1 - P1S0          | 0.767               | 0.478            | (-0.804, 2.337) | 1.61    | 0.526            |
| P4S1 - P1S0          | 0.197               | 0.478            | (-1.374, 1.767) | 0.41    | 0.993            |
| S-5 - P1S0           | 1.633               | 0.478            | (0.063, 3.204)  | 3.42    | 0.041            |
| P4S1 - P2S1          | -0.570              | 0.478            | (-2.140, 1.000) | -1.19   | 0.755            |
| S-5 - P2S1           | 0.867               | 0.478            | (-0.704, 2.437) | 1.81    | 0.417            |
| S-5 - P4S1           | 1.437               | 0.478            | (-0.134, 3.007) | 3.01    | 0.077            |

Individual confidence level = 99.18%.

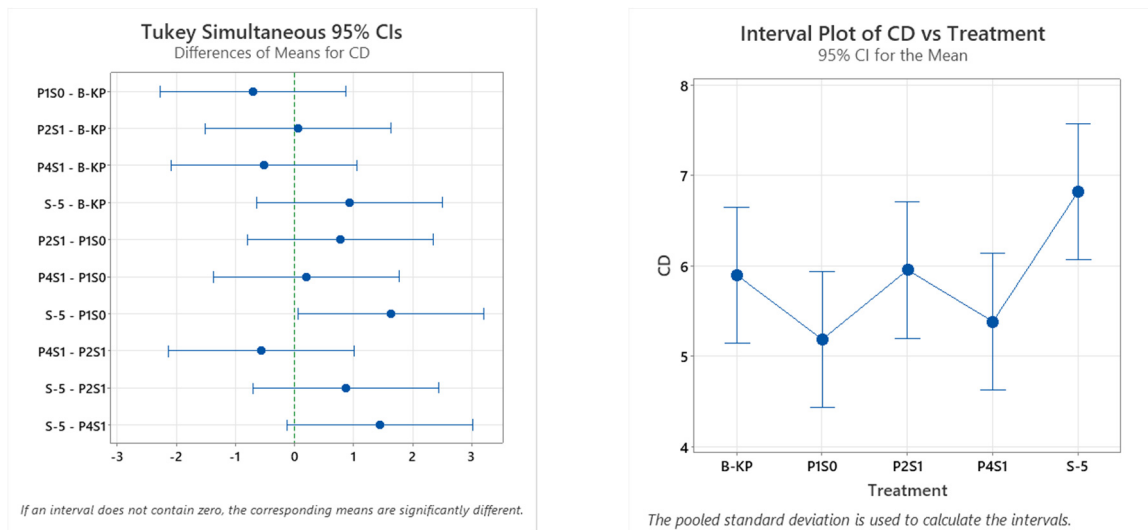

**Figure S11.** Effect of treatments on % elongation (CD).

**Table S8.** Tukey multiple mean comparisons of treatment effects on Young's modulus (MD).

| Difference of Levels | Difference of Means | SE of Difference | 95% CI      | T-Value | Adjusted P-Value |
|----------------------|---------------------|------------------|-------------|---------|------------------|
| P1S0 - B-KP          | 120                 | 102              | (-214, 454) | 1.18    | 0.762            |
| P2S1 - B-KP          | -397                | 102              | (-731, -62) | -3.90   | 0.019            |

|             |      |     |              |       |       |
|-------------|------|-----|--------------|-------|-------|
| P4S1 - B-KP | -97  | 102 | (-431, 238)  | -0.95 | 0.870 |
| S-5 - B-KP  | 240  | 102 | (-94, 574)   | 2.36  | 0.203 |
| P2S1 - P1S0 | -517 | 102 | (-851, -182) | -5.08 | 0.003 |
| P4S1 - P1S0 | -217 | 102 | (-551, 118)  | -2.13 | 0.279 |
| S-5 - P1S0  | 120  | 102 | (-214, 454)  | 1.18  | 0.762 |
| P4S1 - P2S1 | 300  | 102 | (-34, 634)   | 2.95  | 0.085 |
| S-5 - P2S1  | 637  | 102 | (302, 971)   | 6.26  | 0.001 |
| S-5 - P4S1  | 337  | 102 | (2, 671)     | 3.31  | 0.048 |

Individual confidence level = 99.18%.

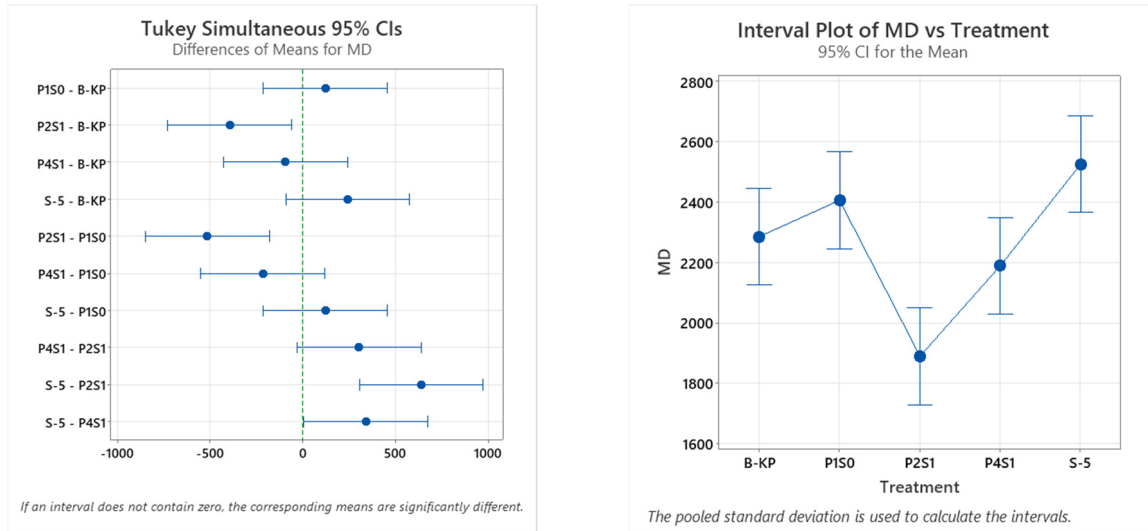

**Figure S12.** Effect of treatments on Young's modulus (MD).

**Table S9.** Tukey multiple mean comparisons of treatment effects on Young's modulus (CD).

| Difference of Levels | Difference of Means | SE of Difference | 95% CI          | T-Value | Adjusted P-Value |
|----------------------|---------------------|------------------|-----------------|---------|------------------|
| P1S0 - B-KP          | -327.3              | 71.0             | (-560.7, -94.0) | -4.61   | 0.007            |
| P2S1 - B-KP          | -271.7              | 71.0             | (-505.0, -38.3) | -3.83   | 0.022            |
| P4S1 - B-KP          | -301.7              | 71.0             | (-535.0, -68.3) | -4.25   | 0.011            |
| S-5 - B-KP           | 41.7                | 71.0             | (-191.7, 275.0) | 0.59    | 0.974            |
| P2S1 - P1S0          | 55.7                | 71.0             | (-177.7, 289.0) | 0.78    | 0.929            |
| P4S1 - P1S0          | 25.7                | 71.0             | (-207.7, 259.0) | 0.36    | 0.996            |
| S-5 - P1S0           | 369.0               | 71.0             | (135.7, 602.3)  | 5.20    | 0.003            |
| P4S1 - P2S1          | -30.0               | 71.0             | (-263.3, 203.3) | -0.42   | 0.992            |
| S-5 - P2S1           | 313.3               | 71.0             | (80.0, 546.7)   | 4.42    | 0.009            |
| S-5 - P4S1           | 343.3               | 71.0             | (110.0, 576.7)  | 4.84    | 0.005            |

Individual confidence level = 99.18%.

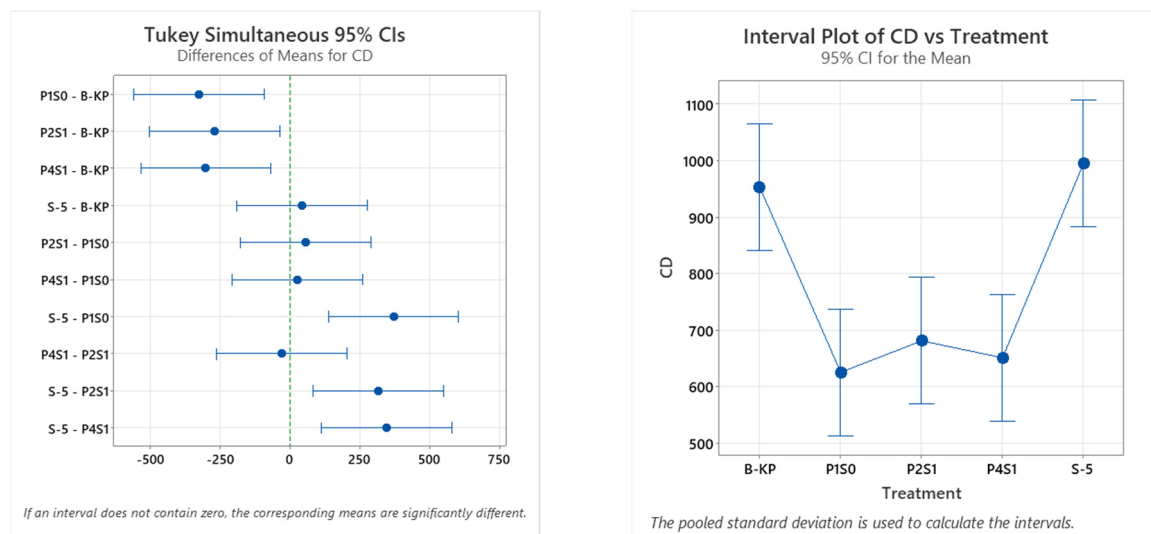

**Figure S13.** Effect of treatments on Young's modulus (CD).

Table S10. provides a summary of our previously reported work in comparison to our current work to provide a better understanding of our work.

**Table S10.** Summary of literature on paper coating approaches showing water and oil resistance coating.

| Coating Materials            | Method                                                                                                  | Cobb60 g/m <sup>2</sup> | Kit Rating | References   |
|------------------------------|---------------------------------------------------------------------------------------------------------|-------------------------|------------|--------------|
| <b>Present Work</b>          |                                                                                                         |                         |            |              |
| <b>PDMS-Starch</b>           | Dual layer approach using starch as a base layer and waterborne emulsion of PDMS, blending with starch. | 2.7 ± 0.14              | 12         | Present work |
| <b>Previous Work</b>         |                                                                                                         |                         |            |              |
| <b>PDMS-grafted-Chitosan</b> | Single layer, PDMS was grafted to chitosan and zein was used as a filler.                               | 21                      | 11         | [1]          |
| <b>Starch/Zein</b>           | Dual layer; starch-zein-based coating. Using starch as a base layer and zein as a top layer.            | 6.2                     | 12         | [2]          |
| <b>PVOH-Zein</b>             | Dual layer; PVOH-zein-based coating. Using PVOH as a base layer and zein as a top layer.                | 3.3                     | 12         | [3]          |
| <b>Chitosan/Zein</b>         | Dual layer; chitosan-zein-based coating. Using chitosan as a base layer and zein as a top layer.        | 4.88                    | 12         | [4]          |

Cost analysis for P1S1, where PDMS-COOH and starch are at 50:50 wt% ratios:  
For P1S1, where PDMS-COOH and starch are at 50:50 wt% ratios:  
Cost of PDMS and Dianhydride Mixture (where each \$ is reported in USD):  
Since PDMS is prepared by reacting ~95 wt% PDMS with ~5 wt% dianhydride; therefore, for one 1 kg of PDMS-COOH:  
The cost of PDMS = 0.95 kg × \$10/kg = \$9.50 (assuming PDMS cost \$10/kg based on conversation with WACKER Silicone)  
The cost of dianhydride = 0.05 kg × \$20/kg = \$1.00 (assuming dianhydride cost \$20/kg, based on publicly available data)  
The cost for 1 kg of PDMS-COOH = \$9.50 + \$1.00 = **\$10.50 per kg**

Cost for the Final Composition:  
The final material is 50% PDMS-COOH and 50% starch.  
Cost for 0.5 kg of PDMS-COOH = \$10.50 × 0.5 = \$5.25  
Cost for 0.5 kg of Starch = \$0.40 × 0.5 = \$0.20 (Assuming starch price as 40 cents per Kg, based on online publicly available data)  
Total cost for 1 kg of the final material = \$5.25 + \$0.20 = \$5.45

---

Therefore, the cost per kg of the final material, which is a blend of PDMS-COOH, and starch in the specified ratios, is \$5.45 per kg. This cost is in the range of polymers such as polyhydroxyalkanoates (PHAs), poly(butylene adipate-*co*-terephthalate) (PBAT), etc.

## References

1. Hamdani, S.S.; Li, Z.; Rabnawaz, M.; Kamdem, D.P.; Khan, B.A., Chitosan–Graft–Poly(dimethylsiloxane)/Zein Coatings for the Fabrication of Environmentally Friendly Oil- and Water-Resistant Paper. *ACS Sustainable Chem. Eng.* **2020**, *8* (13), 5147–5155.
2. Kansal, D.; Hamdani, S.S.; Ping, R.; Rabnawaz, M., Starch and Zein Biopolymers as a Sustainable Replacement for PFAS, Silicone Oil, and Plastic-Coated Paper. *Ind. Eng. Chem. Res.* **2020**, *59* (26), 12075–12084.
3. Hamdani, S.S.; Li, Z.; Sirinakbumrung, N.; Rabnawaz, M., Zein and PVOH-Based Bilayer Approach for Plastic-Free, Repulpable and Biodegradable Oil- and Water-Resistant Paper as a Replacement for Single-Use Plastics. *Ind. Eng. Chem. Res.* **2020**, *59* (40), 17856–17866.
4. Kansal, D.; Hamdani, S.S.; Ping, R.; Sirinakbumrung, N.; Rabnawaz, M., Food-Safe Chitosan–Zein Dual-Layer Coating for Water- and Oil-Repellent Paper Substrates. *ACS Sustainable Chem. Eng.* **2020**, *8* (17), 6887–6897.

**Disclaimer/Publisher’s Note:** The statements, opinions and data contained in all publications are solely those of the individual author(s) and contributor(s) and not of MDPI and/or the editor(s). MDPI and/or the editor(s) disclaim responsibility for any injury to people or property resulting from any ideas, methods, instructions or products referred to in the content.
